# Supplementary material for: Polyaniline Nanofiber Wrapped Fabric for High Performance Flexible Pressure Sensors
Source: PubMed Central journal article supplement (PMC6680572; doi:10.3390/polym11071120), 2019-07-02
Supplement: polymers-11-01120-s001.pdf [file polymers-11-01120-s001.pdf]

## **Supporting Information:**

# **Polyaniline Nanofiber Wrapped Fabric for High Performance Flexible Pressure Sensors**

Kangning Liu,<sup>a,b</sup> Ziqiang Zhou,<sup>a,b</sup> Xingwu Yan,<sup>a</sup> Xiang Meng,<sup>a</sup> Hua Tang,<sup>a</sup> Konggang Qu,<sup>c</sup> Yuanyuan Gao,<sup>a</sup> Ying Li,<sup>a\*</sup>, Junsheng Yu<sup>b</sup> and Lu Li<sup>a\*</sup>

<sup>a</sup>Research Institute for New Materials Technology, Chongqing University of arts and sciences, Chongqing 402160, P. R. China

<sup>b</sup>State Key Laboratory of Electronic Thin Films and Integrated Devices, School of Optoelectronic Science and Engineering, University of Electronic Science and Technology of China (UESTC), Chengdu 610054, P. R. China

<sup>c</sup>School of Chemistry and Chemical Engineering, Liaocheng University, Liaocheng, 252059, China

**Table S1.** Sheet resistance of the polyaniline (PANI) coated fabric

| Test samples       | Concentration of HCl | Sheet resistance (k $\Omega$ /sq) |
|--------------------|----------------------|-----------------------------------|
| Polyaniline fabric | 0.5 mol/L            | 110.85 $\pm$ 16.20                |
| Polyaniline fabric | 1.0 mol/L            | 32.90 $\pm$ 8.81                  |
| Polyaniline fabric | 2.0 mol/L            | 0.97 $\pm$ 0.25                   |

**Table S2.** Comparison of reported flexible pressure sensors.

| Device type      | Active materials                        | Linear pressure range  | Sensitivity                                                                       | Response time (ms) | Ref.                 |
|------------------|-----------------------------------------|------------------------|-----------------------------------------------------------------------------------|--------------------|----------------------|
| Resistive        | CNT                                     | <1.5 kPa               | 14.4 kPa <sup>-1</sup> below 3.5 kPa, 7.8 kPa <sup>-1</sup> for 3.5-15 kPa        | 24                 | 1                    |
| Resistive        | Graphene                                | 0 to 10 kPa            | 8.5 kPa <sup>-1</sup>                                                             | 40                 | 2                    |
| Resistive        | ACNT/<br>Graphene                       | 0 to 0.3 kPa           | 19.8 kPa <sup>-1</sup> below 0.3 kPa, 0.27 kPa <sup>-1</sup> for<br>0.3-5.8 kPa   | <16.7              | 3                    |
| Resistive        | CSilkNM                                 | <0.5 kPa               | 34.47 kPa <sup>-1</sup> for 0.8-400 Pa, 1.16 kPa <sup>-1</sup> for<br>400-5000 Pa | <16.6              | 4                    |
| Resistive        | Graphene                                | 0 to 2.6 kPa           | 25.1 kPa <sup>-1</sup>                                                            | 120                | 5                    |
| Resistive        | Graphene                                | 0 to 25 kPa            | 1.2 kPa <sup>-1</sup>                                                             | -                  | 6                    |
| Resistive        | Graphene                                | 0 to 0.2 kPa           | 110 kPa <sup>-1</sup>                                                             | 30                 | 7                    |
| Resistive        | CB/PVDF-<br>decorated<br>knitted fabric | <1.2 kPa               | $\approx$ 1.5 kPa <sup>-1</sup>                                                   | 2                  | 8                    |
| Resistive        | SWCNT film                              | 0.6 Pa to 300 kPa      | 1.8 kPa <sup>-1</sup>                                                             | <10                | 9                    |
| Resistive        | Carbonized<br>crepe paper               | 0 to 0.42 kPa          | 5.67 kPa <sup>-1</sup>                                                            | <30                | 10                   |
| Resistive        | Laser-scribed<br>graphene               | 0 to 50 kPa            | 0.96 kPa <sup>-1</sup> for 0-50 kPa, 0.005 kPa <sup>-1</sup> for<br>50-113 kPa    | 72                 | 11                   |
| Capacitance      | CNT<br>fiber/Ecoflex                    | 0.38 Pa to 0.05<br>kPa | 0.034-0.05 kPa <sup>-1</sup> below 0.1 kPa,<br>0.5 MPa <sup>-1</sup> above 10 kPa | $\approx$ 63       | 12                   |
| Resistive        | PANI                                    | 0 to 1.6 kPa           | <1 kPa <sup>-1</sup>                                                              | 400                | 13                   |
| Resistive        | PANI                                    | <2.2 kPa               | Maximum 0.89 kPa <sup>-1</sup>                                                    | -                  | 14                   |
| <b>Resistive</b> | <b>PANI</b>                             | <b>0 to 4.5 kPa</b>    | <b>46.48 kPa<sup>-1</sup></b>                                                     | <b>7</b>           | <b>This<br/>work</b> |

CNT: carbon nanotube. ACNT: aligned carbon nanotube. CSilkNM: carbonized silk nanofiber membranes  
SWCNT: single-walled carbon nanotube. PVDF: polyvinylidene fluoride.

## References:

1. Liu, M.; Pu, X.; Jiang, C.; Liu, T.; Huang, X.; Chen, L.; Du, C.; Sun, J.; Hu, W.; Wang, Z. L. Large-Area All-Textile Pressure Sensors for Monitoring Human Motion and Physiological Signals. *Adv. Mater.* **2017**, *29*, 1703700.
2. Bae, G. Y.; Pak, S. W.; Kim, D.; Lee, G.; Kim, D. H.; Chung, Y.; Cho, K. Linearly and Highly Pressure-Sensitive Electronic Skin Based on a Bioinspired Hierarchical Structural Array. *Adv. Mater.* **2016**, *28*, 5300-5306.
3. Jian, M.; Xia, K.; Wang, Q.; Yin, Z.; Wang, H.; Wang, C.; Xie, H.; Zhang, M.; Zhang, Y. Flexible and highly sensitive pressure sensors based on bionic hierarchical structures. *Adv. Funct. Mater.* **2017**, *27*, 1606066.
4. Wang, Q.; Jian, M.; Wang, C.; Zhang, Y. Carbonized Silk Nanofiber Membrane for Transparent and Sensitive Electronic Skin. *Adv. Funct. Mater.* **2017**, *27*, 1605657.
5. Pang, Y.; Zhang, K.; Yang, Z.; Jiang, S.; Ju, Z.; Li, Y.; Wang, X.; Wang, D.; Jian, M.; Zhang, Y.; Liang, R.; Tian, H.; Yang, Y.; Ren, T.-L. Epidermis Microstructure Inspired Graphene Pressure Sensor with Random Distributed Spinosum for High Sensitivity and Large. *ACS Nano*. **2018**, *12*, 2346-2354.
6. Shi, J.; Wang, L.; Dai, Z.; Zhao, L.; Du, M.; Li, H.; Fang, Y. Multiscale Hierarchical Design of a Flexible Piezoresistive Pressure Sensor with High Sensitivity and Wide Linearity Range. *Small*. **2018**, *14*, 1800819.
7. Xia, K.; Wang, C.; Jian, M.; Wang, Q.; Zhang, Y. CVD growth of fingerprint-like patterned 3D graphene film for an ultrasensitive pressure sensor. *Nano. Res.*, **2018**, *11*, 1124-1134.
8. Luo, N.; Zhang, J.; Ding, X.; Zhou, Z.; Zhang, Q.; Zhang, Y. -T.; Chen, S. -C.; Hu, J. -L.; Zhao, N. Textile-Enabled Highly Reproducible Flexible Pressure Sensors for Cardiovascular Monitoring. *Adv. Mater. Technol.* **2017**, *3*, 1700222.
9. Wang, X.; Gu, Y.; Xiong, Z.; Cui, Z.; Zhang, T. Silk-Molded Flexible, Ultrasensitive, and Highly Stable Electronic Skin for Monitoring Human Physiological Signals. *Adv. Mater.* **2014**, *26*, 1336-1342.
10. Chen, S.; Song, Y.; Xu, F. Flexible and Highly Sensitive Resistive Pressure Sensor Based on Carbonized Crepe Paper with Corrugated Structure. *ACS Appl. Mater. Interfaces*, **2018**, *10*, 34646-34654.
11. Tian, H.; Shu, Y.; Wang, X. F.; Mohammad, M. A.; Bie, Z.; Xie, Q. Y.; Li, C.; Mi, W. T.; Yang, Y.; Ren, T. L. A Graphene-Based Resistive Pressure Sensor with Record-High Sensitivity in a Wide Pressure Range. *Sci. Rep.*, **2015**, *5*, 8603.
12. Park, S.; Kim, H.; Vosgueritchian, M.; Cheon, S.; Kim, H.; Koo, J. H.; Kim, T. R.; Lee, S.; Schwartz, G.; Chang, H.; Bao, Z. Stretchable Energy-Harvesting Tactile Electronic Skin Capable of Differentiating Multiple Mechanical Stimuli Modes. *Adv. Mater.*, **2014**, *26*, 7324.
13. Tang, X.; Wu, C.; Zhang, T.; Zhou, T.; Wang, H.; Xie, C.; Zeng, D. A Low-Cost

Polyaniline@Textile-Based Multifunctional Sensor for Simultaneously Detecting Tactile and Olfactory Stimuli. *Macromol. Mater. Eng.*, **2018**, 1800340.

14. Liu, H.; Wu, Y.; Chen, S.; Liu, S.; Wang, P.; Xue, F.; Liu, L. A flexible and multifunctional electronic nose using polyaniline/cotton fibrous membrane with a hierarchical structure. *J.Matlet.*, **2018**, 09, 046.
